# Supplementary material for: Disruption of Multiple Overlapping Functions Following Stepwise Inactivation of the Extended Myc Network
Source: MDPI journal article supplement (doi:10.3390/cells11244087), 2022-12-16
Supplement: s1 [file s1]

---

# Supplementary Materials for

## Disruption of Multiple Overlapping Functions Following Step-Wise Inactivation of the Extended Myc Network

Huabo Wang, Taylor Stevens, Jie Lu, Merlin Airik, Rannar Airik, Edward V. Prochownik\*

\*Corresponding author. Email: [procev@chp.edu](mailto:procev@chp.edu)

### **This PDF file includes:**

Figures S1 to S20

Tables S1 to S4

---

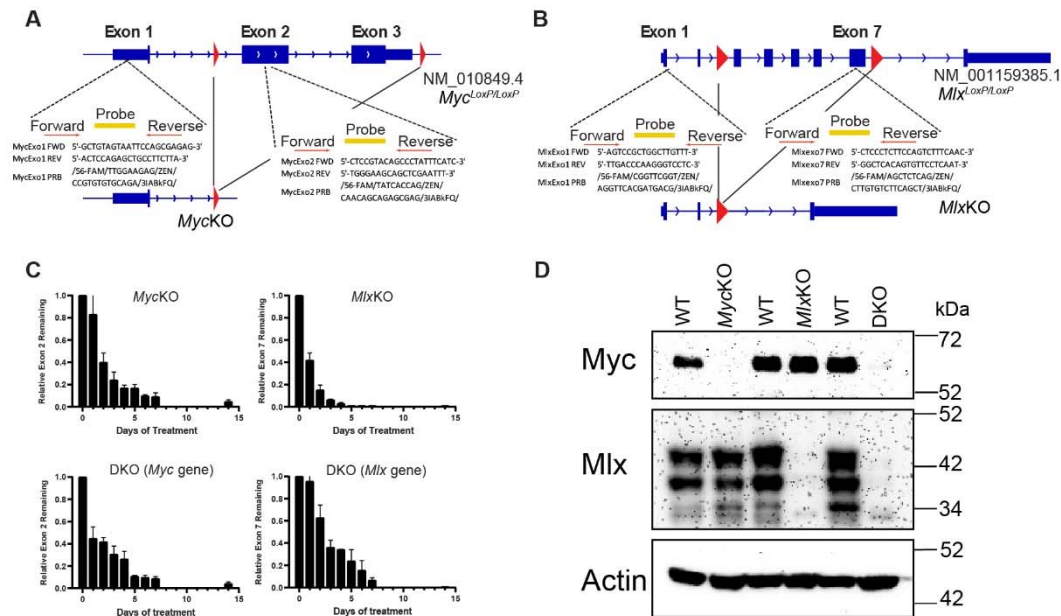

**Figure S1. Time-dependent excision of *Myc* and/or *Mlx* alleles.** (A). Structure of the “floxed” *Myc* gene in MEFs showing the position of LoxP sites flanking exons 2 and 3 and the TaqMan strategy used to quantify WT and mutant alleles (1). (B). Structure of the floxed *Mlx* gene showing the position of LoxP sites flanking exons 3 and 7 the TaqMan strategy used to quantify WT and mutant alleles (1). (C). Progressive loss of intact target gene alleles during the course of 4OHT treatment. MEFs were treated with fresh 4OHT daily (500 nM) for 7 days. DNAs were extracted from triplicate cultures and used for quantitative TaqMan-based assays to quantify the relative proportions of intact WT and KO alleles (1). (D). Immuno-blotting for Myc and Mlx proteins in the indicated cell lines performed on day 10. Similar results were obtained in 2 additional replicas (not shown). KO cells were routinely maintained in 4OHT and periodically checked for the presence of intact alleles and the expression of protein in order to ensure the stability of the KO population.

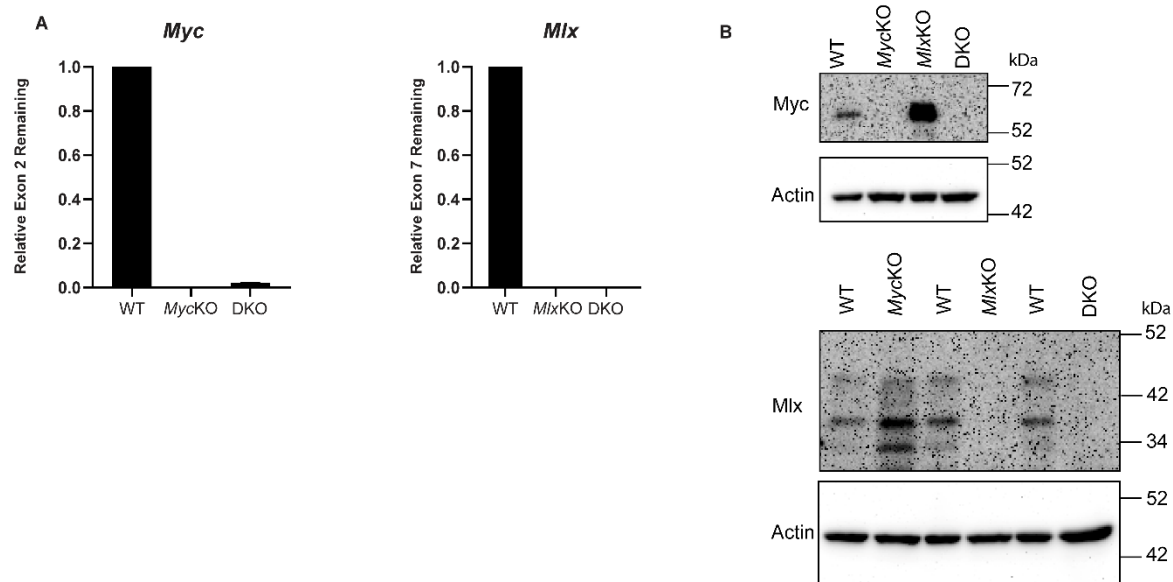

**Figure S2. Excision and loss of expression of *Myc* and *Mlx* in immortalized MEFs.** Early passage MEFs were transduced with an SV40 T-antigen-encoding lentiviral vector and selected in blasticidin for two weeks. Cells were then either exposed to 4OHT for 10 days or maintained in 4OHT-free medium to serve as WT control cells. **(A).** Excision of the *Myc* and/or *Mlx* loci following 10 days of 4OHT treatment. qPCR-based TaqMan assays to quantify WT and KO gene loci in each cell line were performed as described in Fig. S1A & B. **(B).** Expression of the indicated proteins detected by immuno-blotting as described in Fig. S1D.

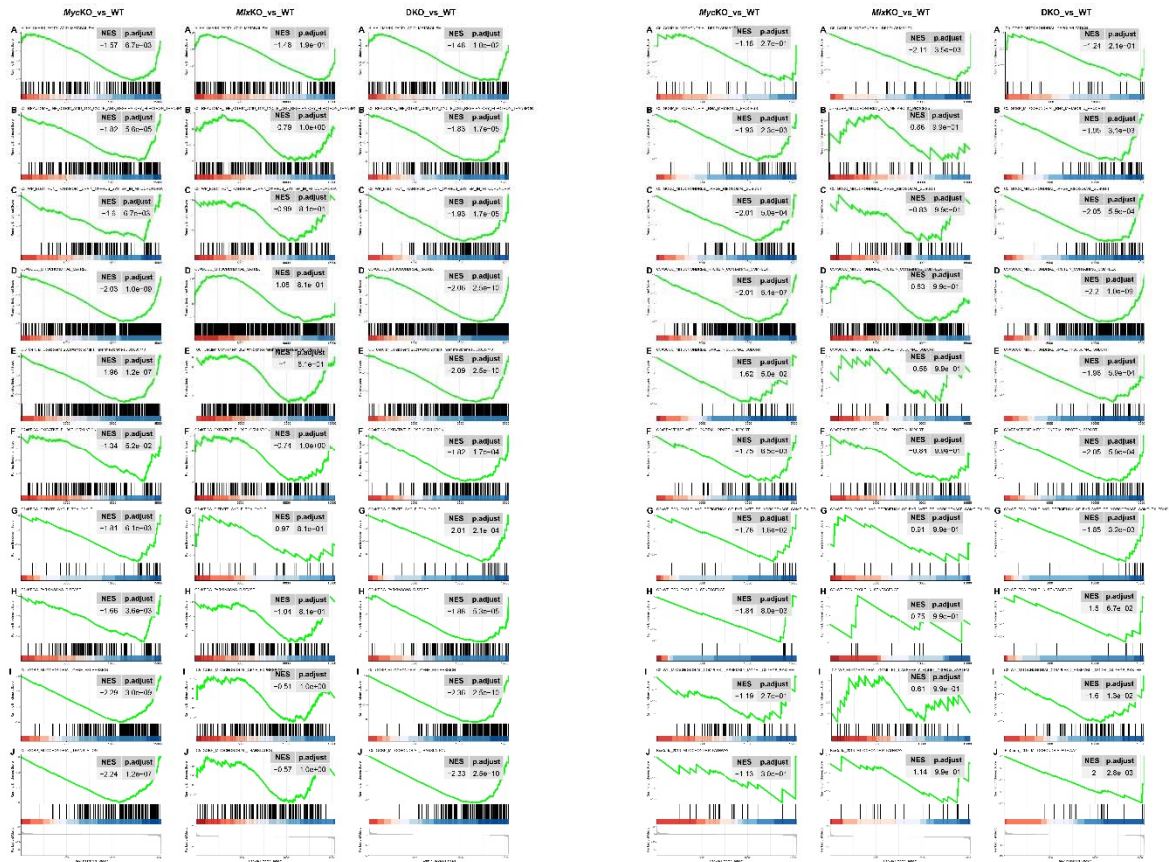

Figure S3. GSEA plots for gene sets involved in mitochondrial structure/function. Some of these gene sets are also displayed in Fig. 5D as ridgeline plots.



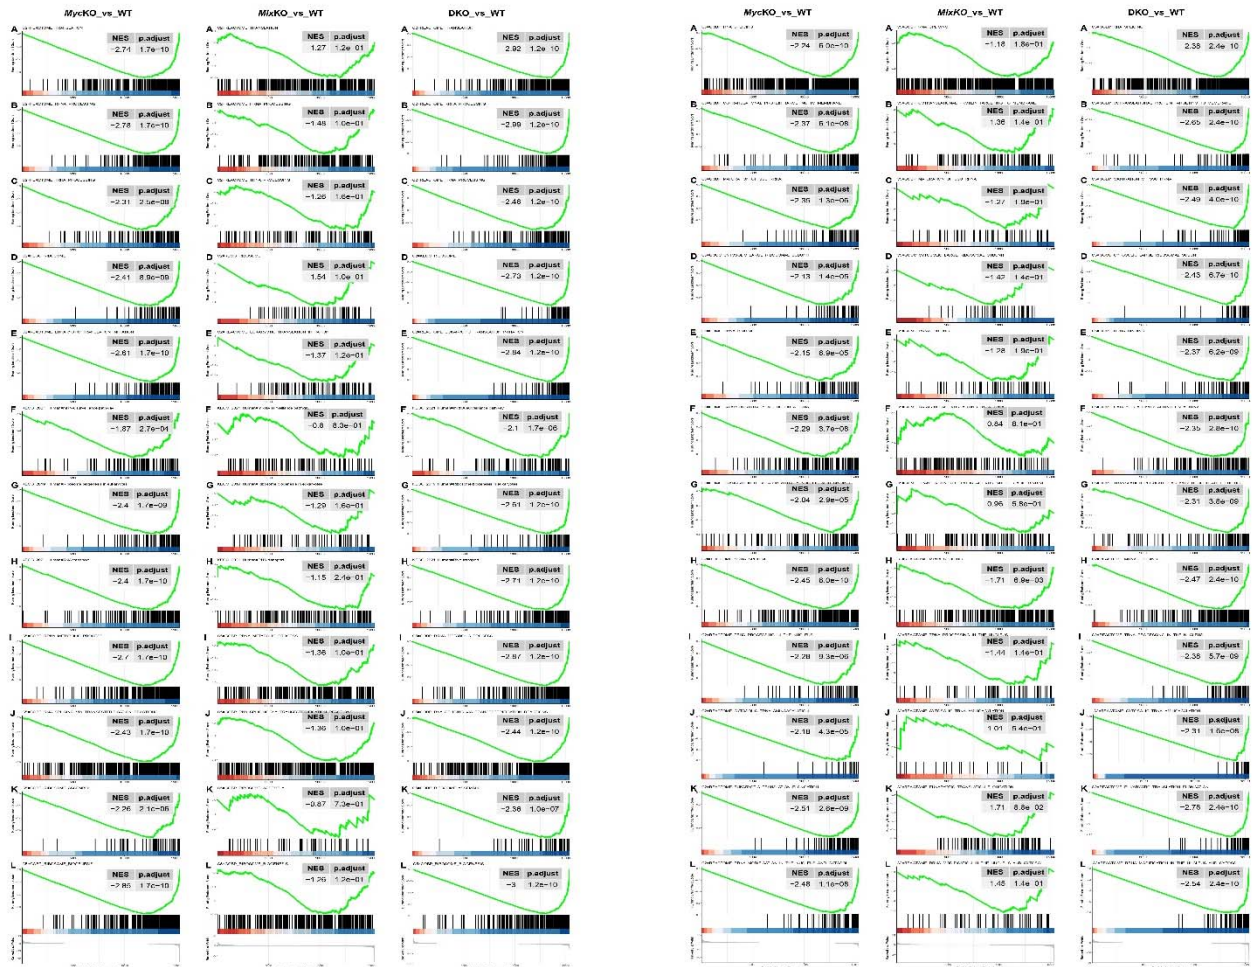

Figure S4. GSEA plots for gene sets involved in ribosome structure/translation. Some of these gene sets are also displayed in Fig. 5D as ridgeline plots.

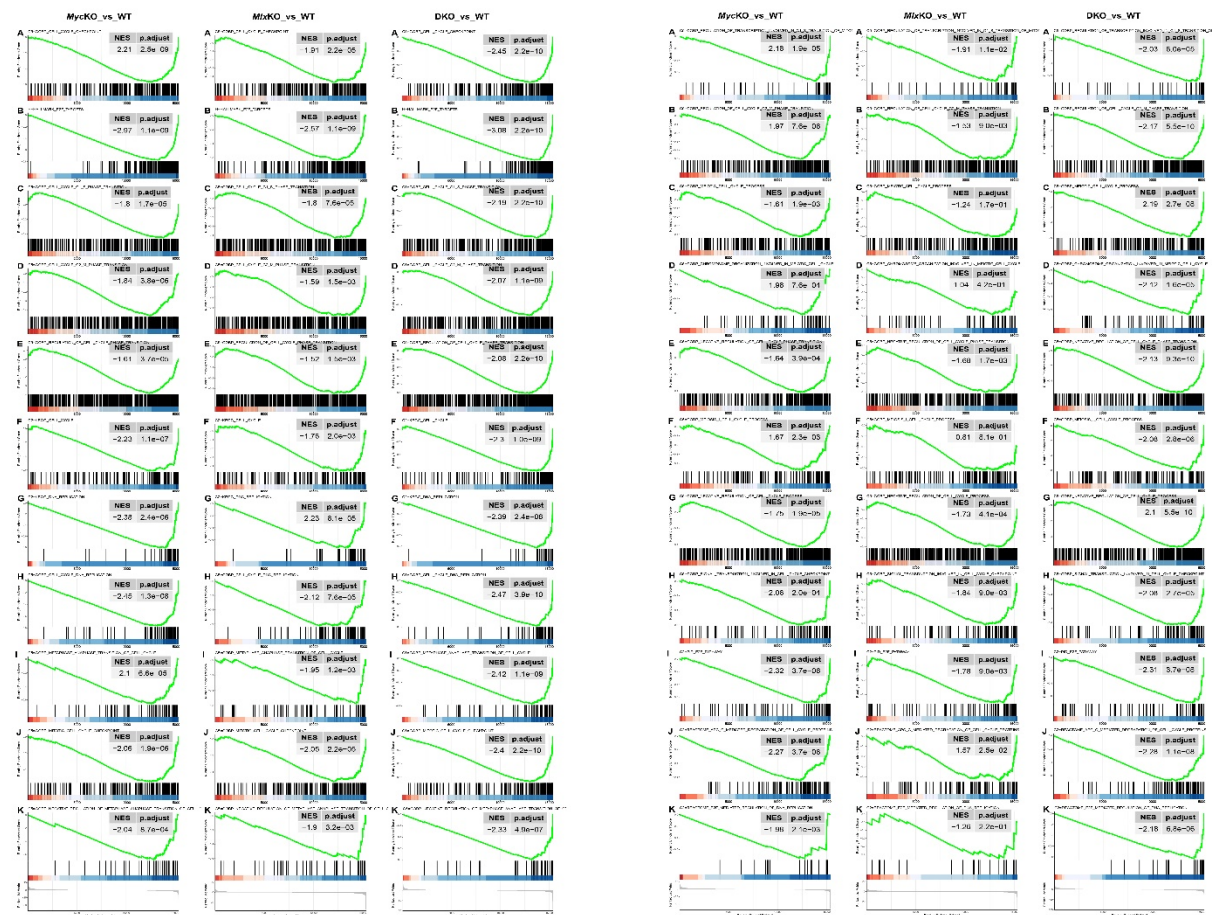

Figure S5. GSEA plots for gene sets involved in cell cycle regulation. Some of these gene sets are also displayed in Fig. 5D as ridgeline plots.

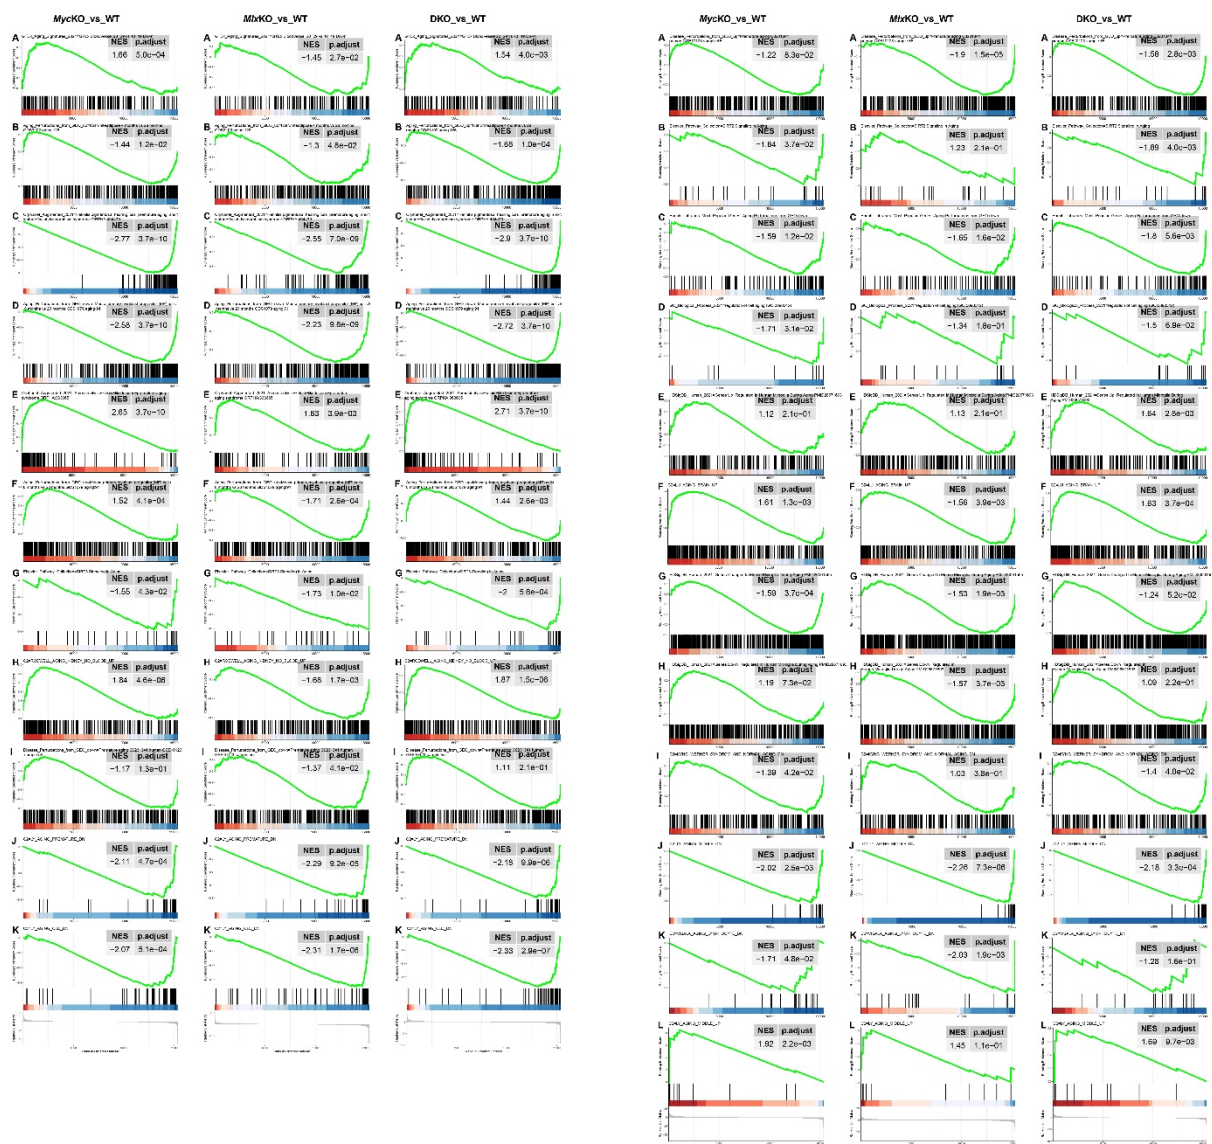

Figure S6. GSEA plots for gene sets involved in aging. Some of these gene sets are also displayed in Fig. 5D as ridgeline plots.



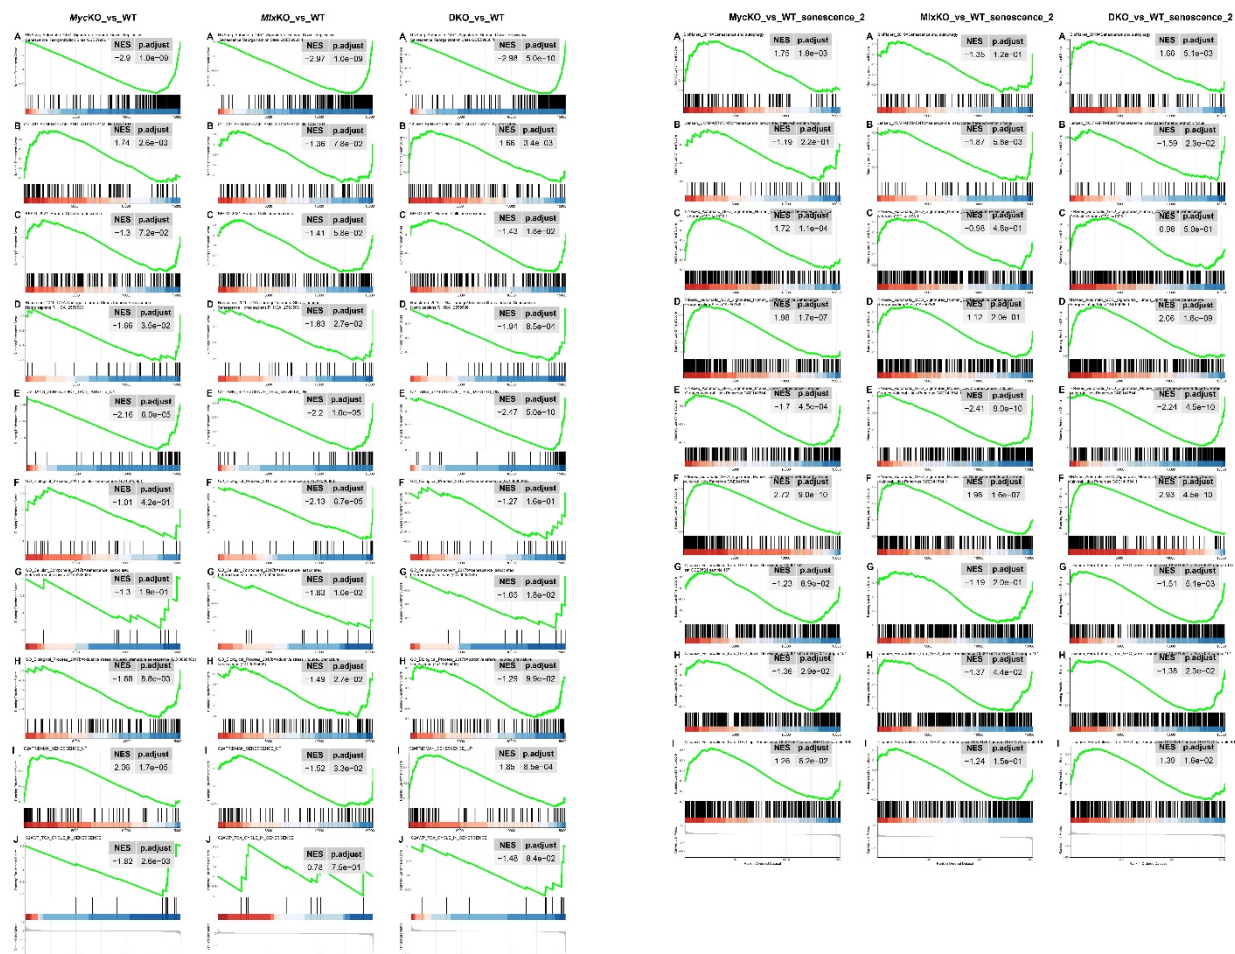

Figure S7. GSEA plots for gene sets involved in senescence. Some of these gene sets are also displayed in Fig. 5D as ridgeline plots.

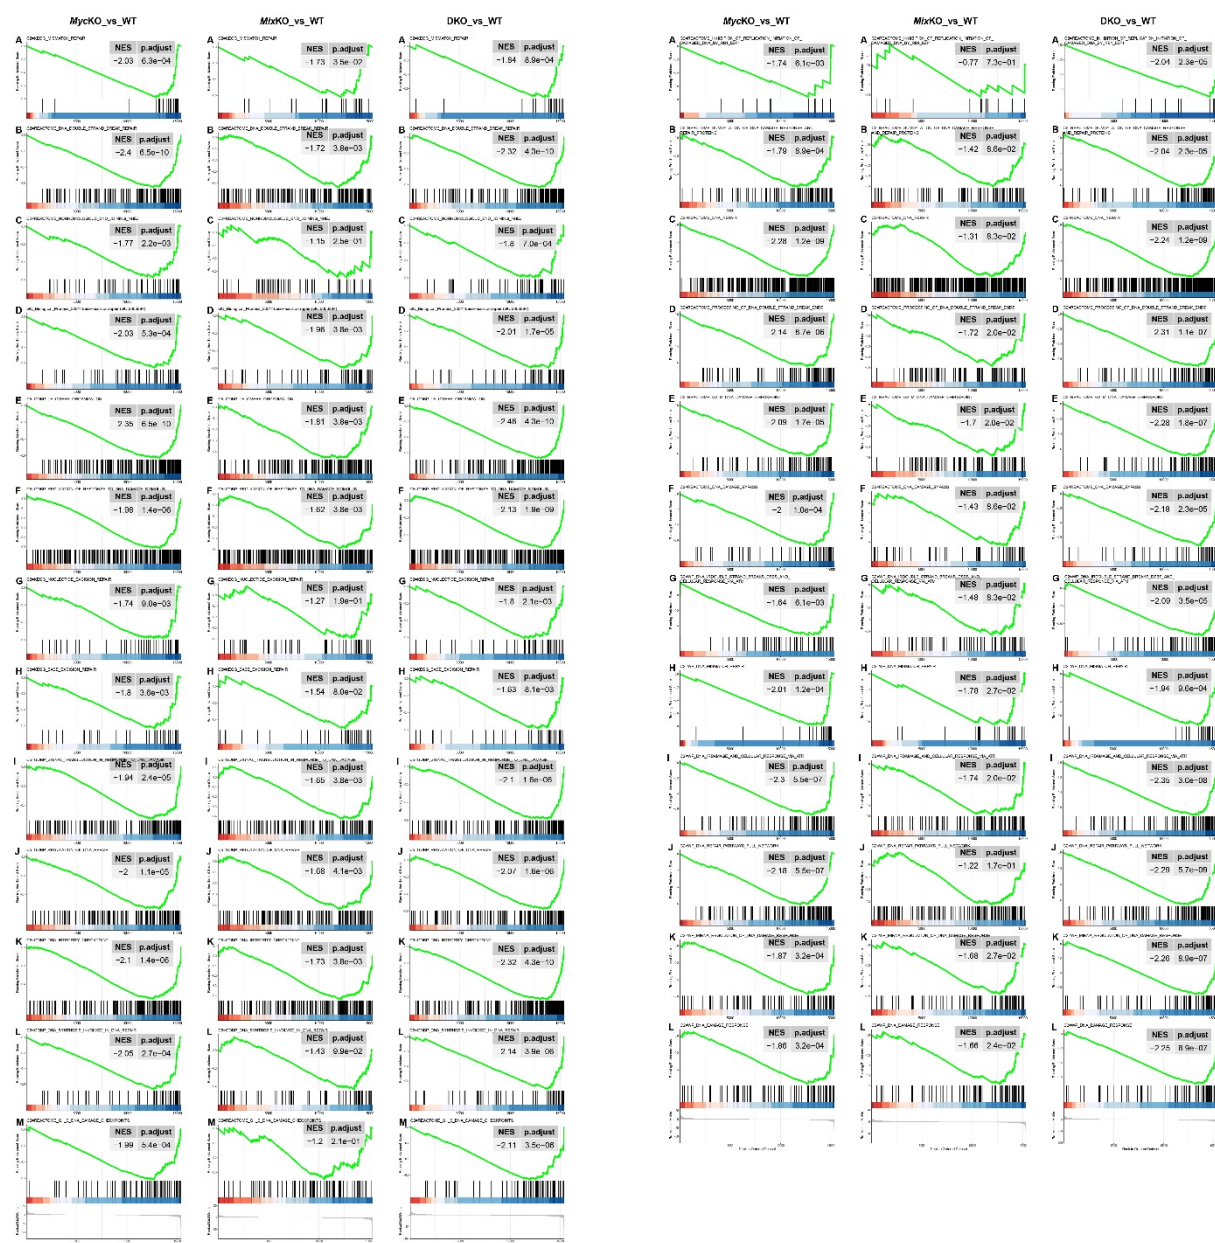

Figure S8. GSEA plots for gene sets involved in DNA damage response/DNA repair. Some of these gene sets are also displayed in Fig. 5D as ridgeline plots.

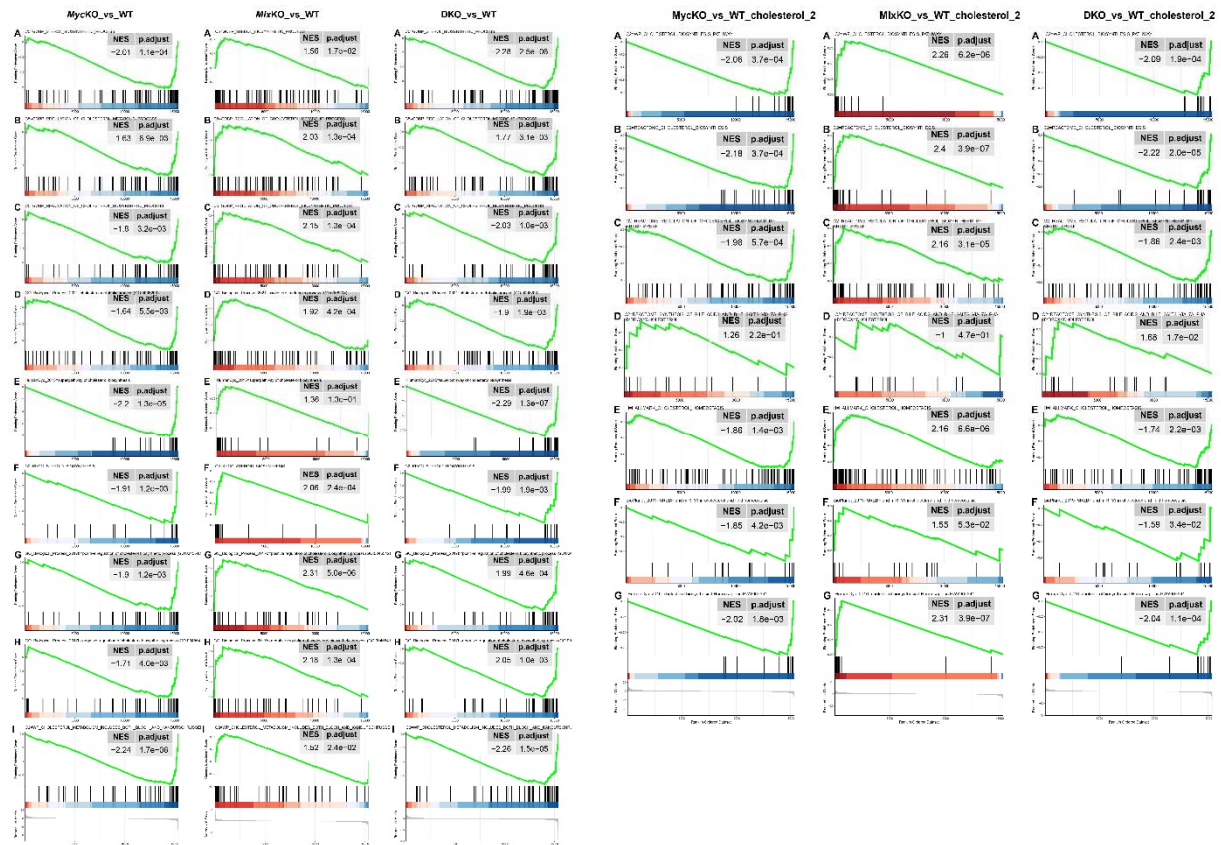

**Figure S9. GSEA plots for gene sets involved in cholesterol metabolism.** Some of these gene sets are also displayed in Fig. 5D as ridgeline plots.

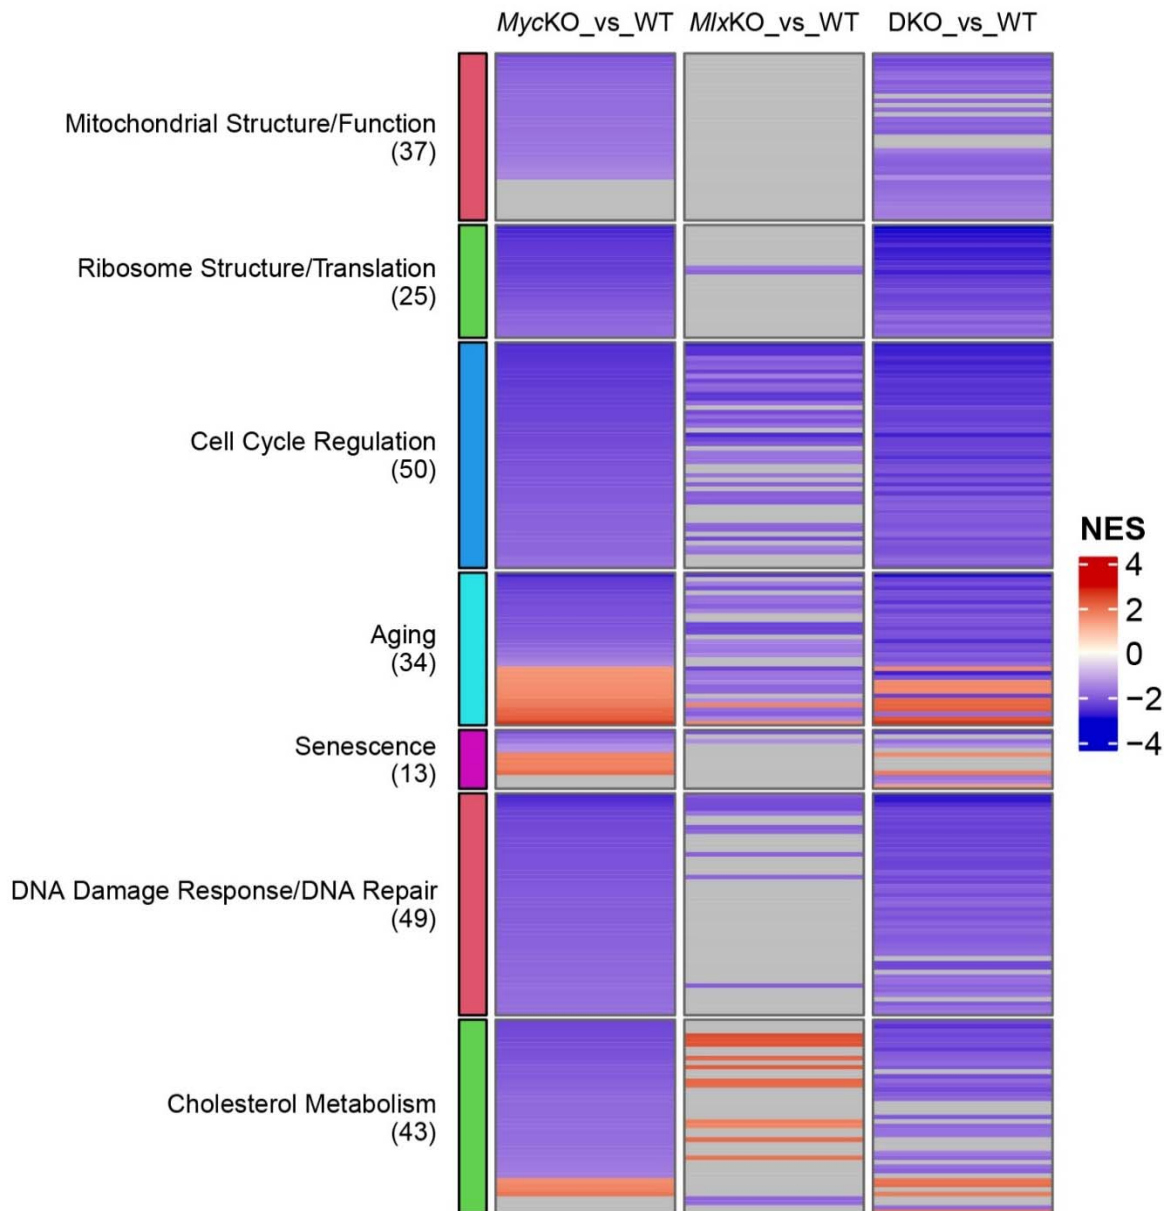

**Figure S10. Heat map of the top functional categories of differentially enriched gene sets among each of the three KO MEF lines.** Both unbiased and directed GSEA was performed by mining the EnrichR data base (1, 2). Each of the top functional categories of enriched genes is indicated to the left of the heat map with number of significantly enriched gene sets contained within the categories indicated beneath. Select members of each group are depicted in the ridgeline blots shown in Fig. 5D and Figs. S3-S9.





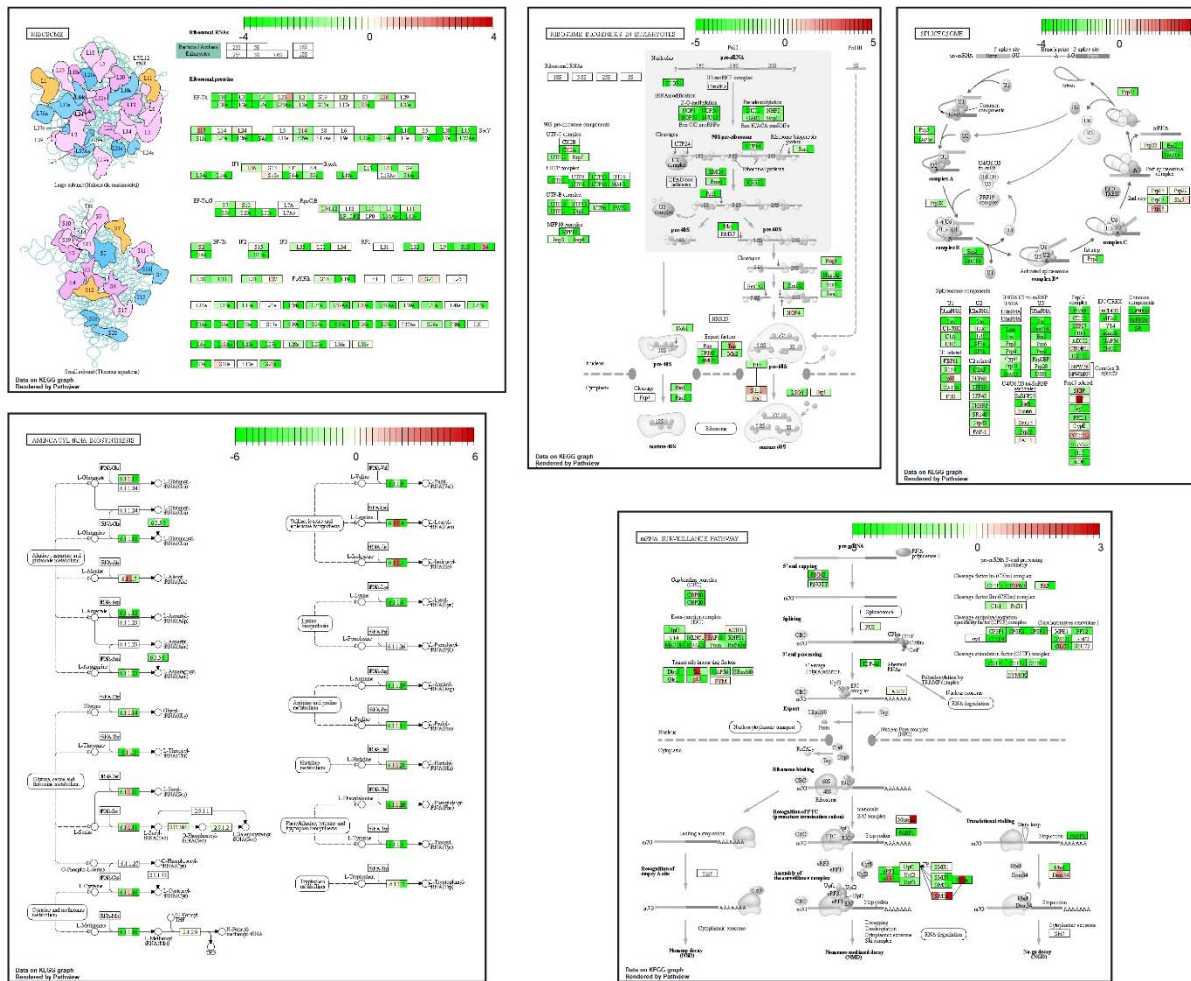

**Figure S12.** Pathview analysis of individual transcript mean expression levels within the five available "Ribosome Structure/Translation" KEGG profiles from those depicted in Fig. 5D and Fig. S10. The boxes within which each transcript is enclosed are divided into three segments indicating that transcript's expression relative to that of WT MEFs in *MycKO* cells (left), *MlxKO* cells (middle) and *DKO* cells (right).



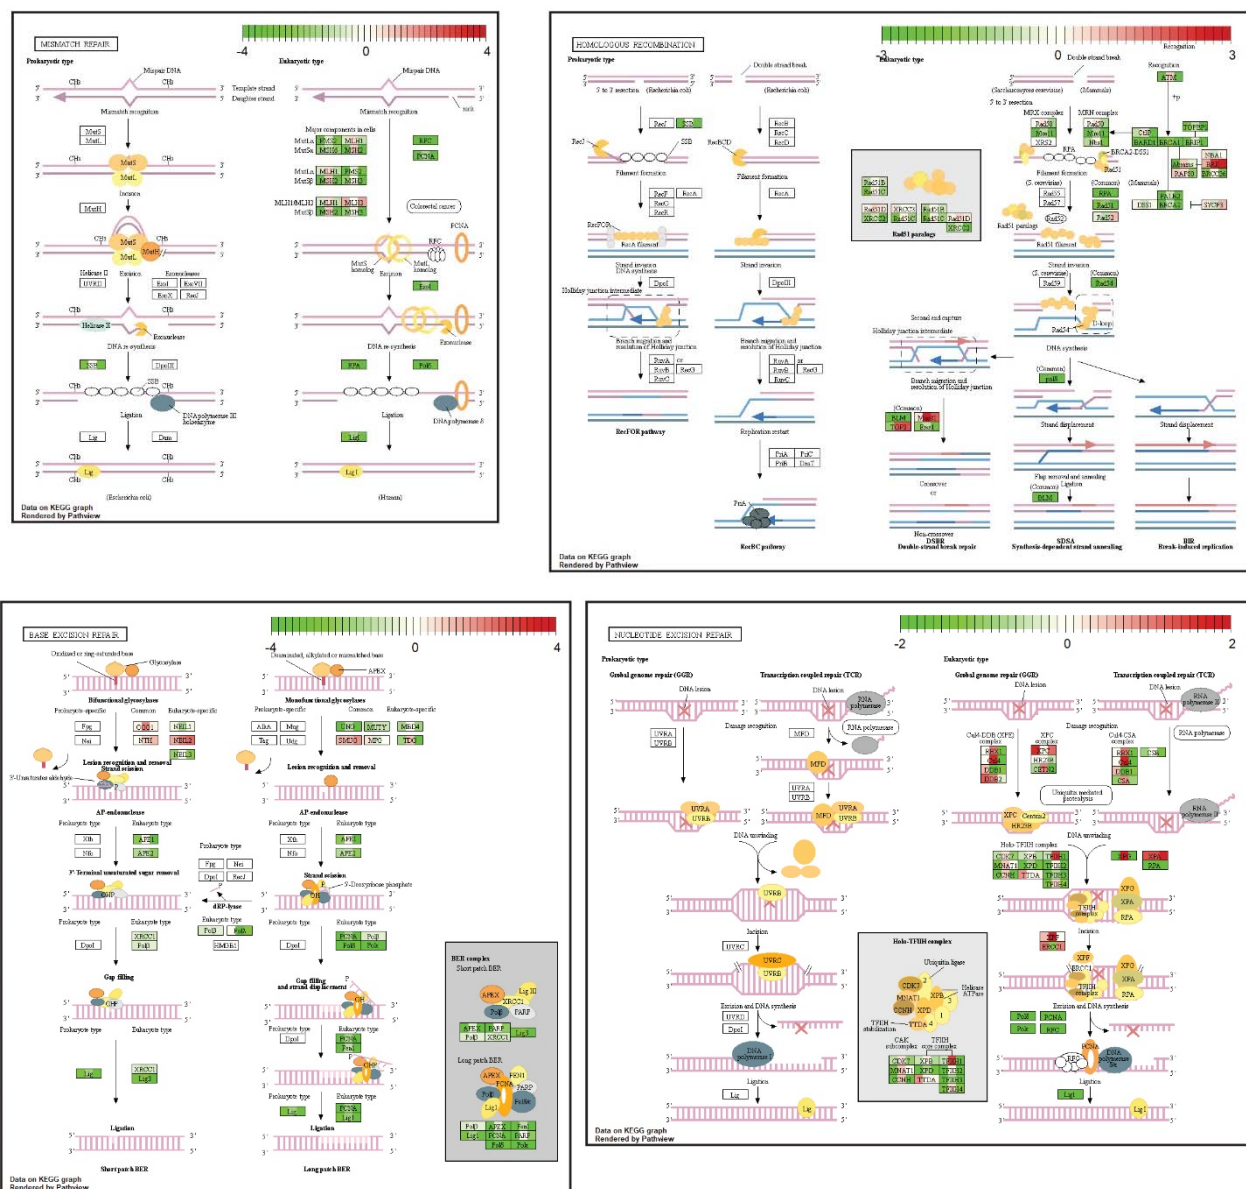

**Figure S14.** Pathview analysis of individual transcript mean expression levels within the four available "DNA Damage Response/DNA Repair" KEGG profiles from those depicted in Fig. 5D and Fig. S10. The boxes within which each transcript is enclosed are divided into three segments indicating that transcript's expression relative to that of WT MEFs in *Myc*KO cells (left), *Mlx*KO cells (middle) and DKO cells (right).

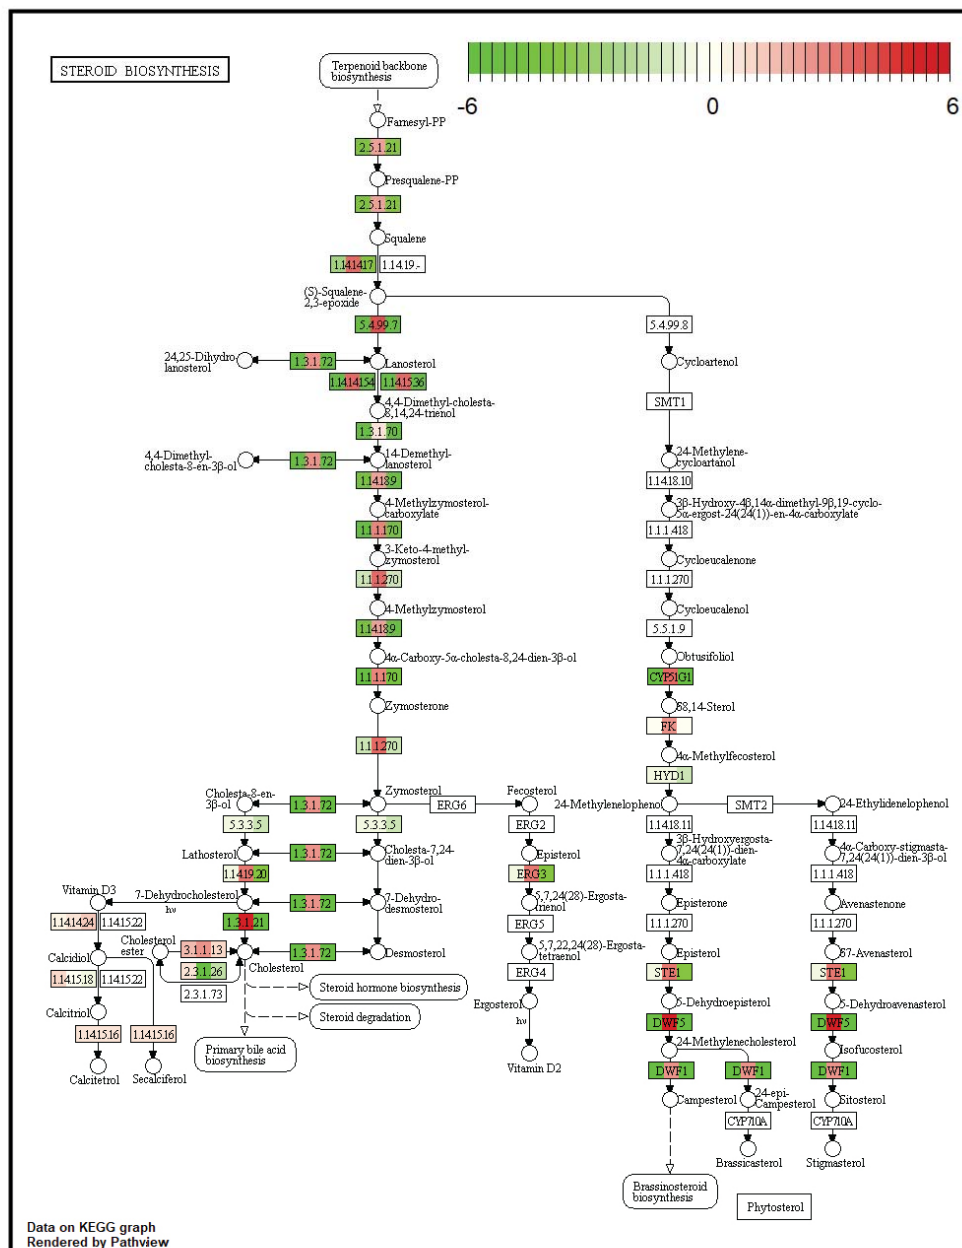

**Figure S15.** Pathview analysis of individual transcript mean expression levels within the only available "Cholesterol Metabolism" KEGG profile from those depicted in Fig. 5D and Fig. S10. The boxes within which each transcript is enclosed are divided into three segments indicating that transcript's expression relative to that of WT MEFs in *MycKO* cells (left), *MlxKO* cells (middle) and *DKO* cells (right).

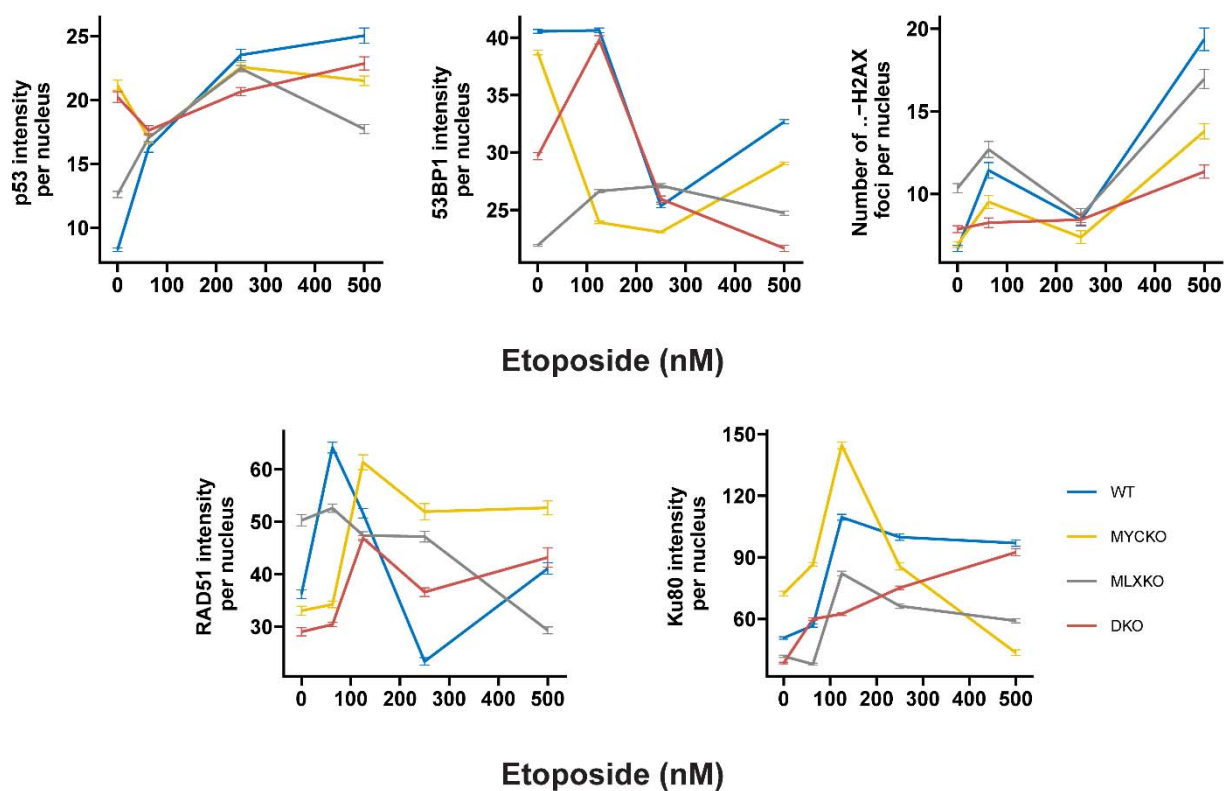

**Figure S16. Response of the proteins shown in Fig. 6 to DSBs induced by etoposide.** The results from Fig. 6B were re-graphed to better demonstrate the abnormal dose-response kinetics of each MEF cell line. Each point represents the mean intensity or number of foci  $\pm 1$  S.E.



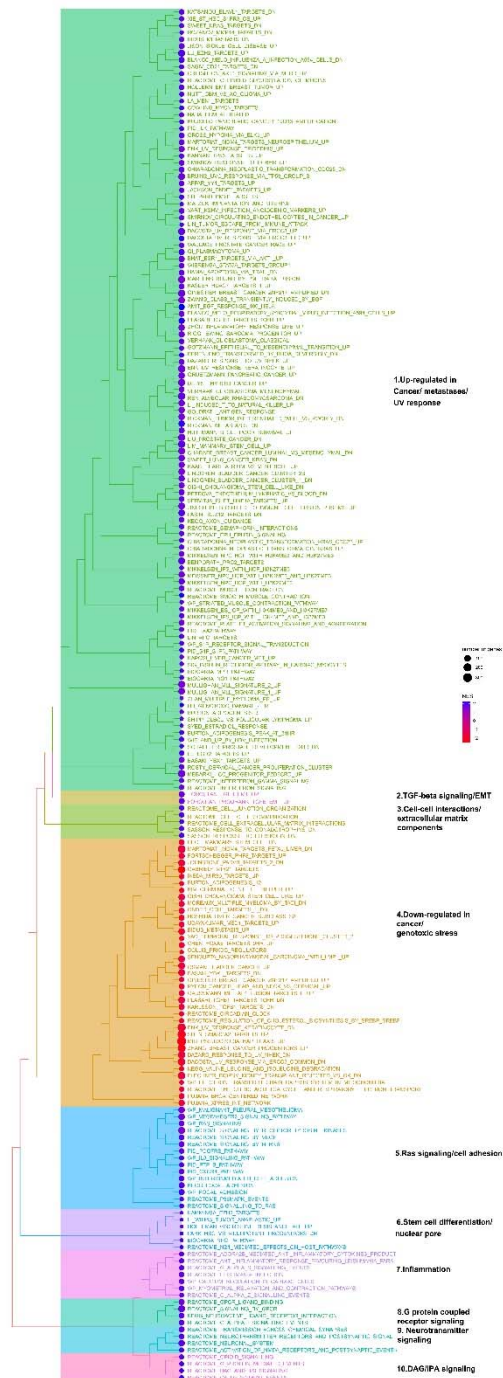

**Figure S17.** Tree plot for the top ten categories of enriched gene sets in immortalized *Myc*KO vs. WT MEFs. GSEA and data clustering were obtained from the MSigDB C2 data base and analyzed and displayed with the clusterProfiler tool treemap (<https://bioconductor.org/packages/release/bioc/html/clusterProfiler.html>). All relevant gene sets with q values <0.05 are shown.



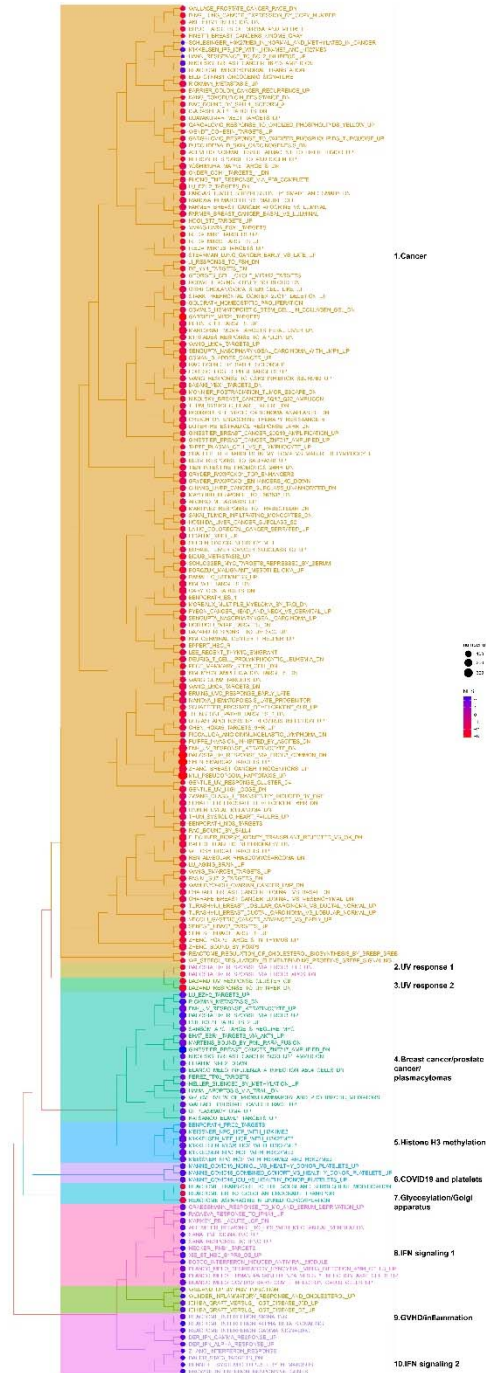

**Figure S18. Treeplot for the top ten categories of enriched gene sets in immortalized *MlxKO* vs. WT MEFs.** GSEA and data clustering were obtained from the MSigDB C2 data base and analyzed and displayed with the clusterProfiler tool treeplot ([https://bioconductor.org/packages-release/bioc/html/clusterProfiler.html](https://bioconductor.org/packages/release/bioc/html/clusterProfiler.html)). All relevant gene sets with q values <0.05 are shown.

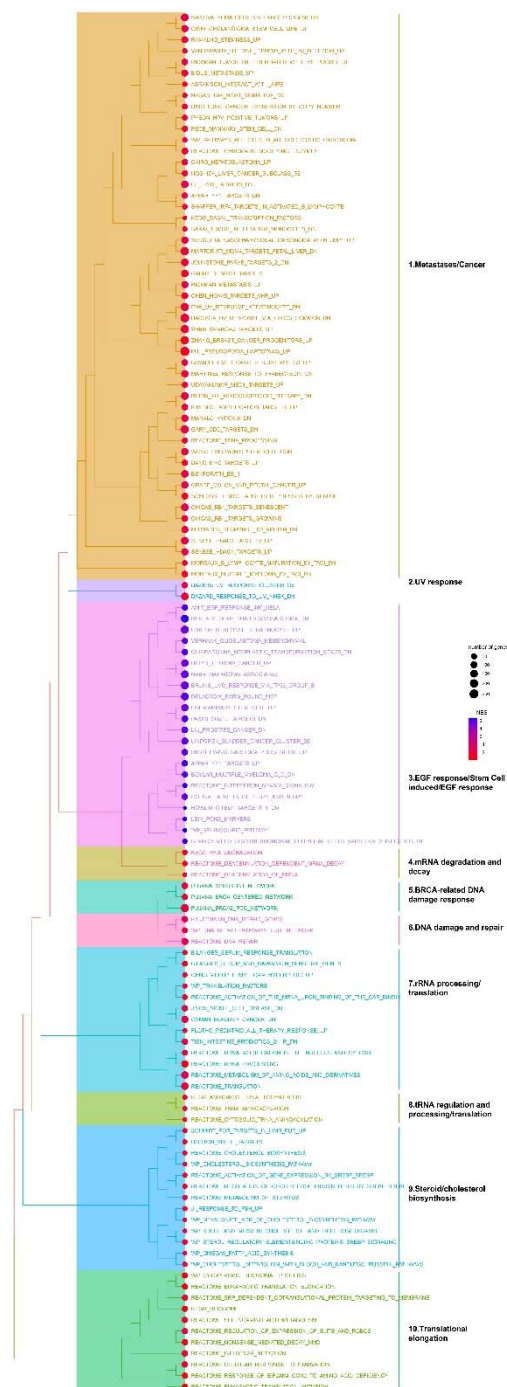

**Figure S19. Treeplot for the top ten categories of enriched gene sets in immortalized DKO vs. WT MEFs.** GSEA and data clustering were obtained from the MSigDB C2 data base and analyzed and displayed with the clusterProfiler tool treeplot (<https://bioconductor.org/packages/release/bioc/html/clusterProfiler.html>). All relevant gene sets with q values <0.05 are shown.

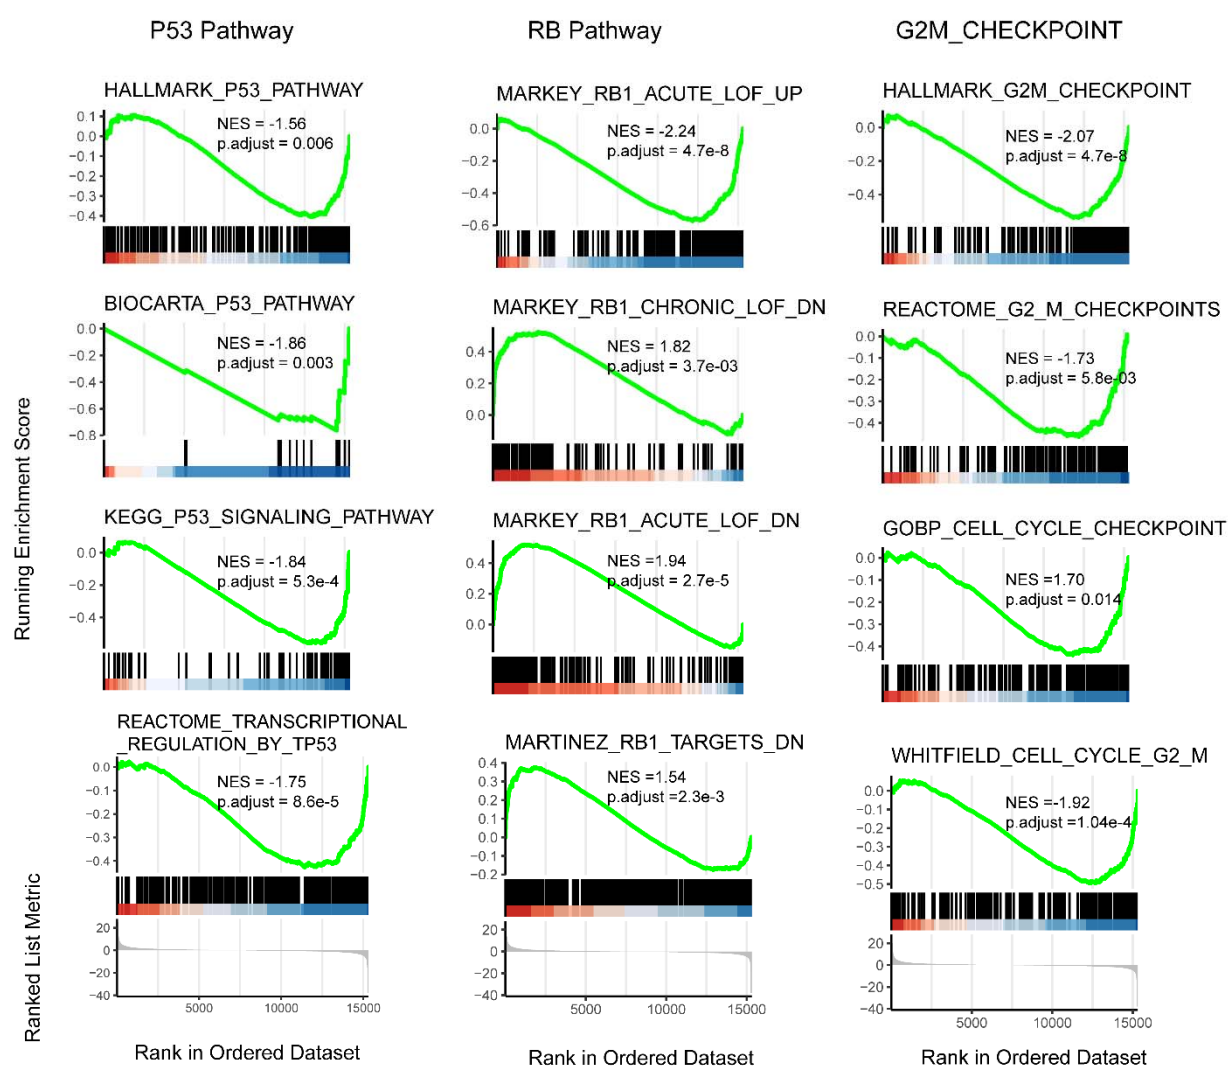

**Figure S20. GSEA analysis for primary DKO vs *Myc*KO MEFs using RNAseq data from Fig. 5.** Among the top categories of differentially expressed transcripts were those involving the p53 and Rb pathways and G<sub>2</sub>/M checkpoint blockade, all of which pointed to down-regulation/inhibition in DKO MEFs.

**Table S1. List of all antibodies used in the current study.**

| <b>Name of antigen</b> | <b>Type of antibody</b> | <b>Vendor</b>  | <b>Catalog number</b> | <b>Dilution</b> | <b>Purpose</b>      |
|------------------------|-------------------------|----------------|-----------------------|-----------------|---------------------|
| Glut 1                 | Rabbit mAb              | Abcam          | Ab115730              | 1:2000          | WB                  |
| Glut 4                 | Mouse mAb               | Cell Signaling | 2213                  | 1:1000          | WB                  |
| GAPDH                  | Mouse mAb               | Sigma          | G8795                 | 1:10,000        | WB                  |
| c-Myc                  | Rabbit mAb              | Cell Signaling | 13987                 | 1:1000          | WB                  |
| MLx                    | Rabbit mAb              | Cell Signaling | 85570                 | 1:500           | WB                  |
| β-Actin                | Rabbit mAb              | Cell Signaling | 3700                  | 1:1000          | WB                  |
| IgG                    | HRP-Goat- anti-rabbit   | Cell Signaling | 7074                  | 1:5000          | Secondary for WB    |
| IgG                    | HRP-Goat- anti-mouse    | Cell Signaling | 7076                  | 1:10,000        | Secondary for WB    |
| γ-H2Ax (pSer139)       | Mouse mAb               | Millipore      | 05-636                | 1:2000          | DSB detection (IHC) |
| Puromycin              | Mouse mAb               | Millipore      | MABE343               | 1:20,000        | WB                  |
| RAD51                  | Rabbit pAb*             | Abcam          | Ab133534              | 1:1000          | HEJ**(IHC)          |
| 53BP1                  | Rabbit pAb              | NovusBio       | NB100-304             | 1:200           | DSB detection (IHC) |
| P53                    | Rabbit pAb              | Abcam          | Ab131442              | 1:1000          | DNA damage (IHC)    |
| Ku80                   | Rabbit mAb              | Abcam          | Ab80592               | 1:500           | NHEJ***             |

\*pAb=Polyclonal antibody

\*\*HEJ=homologous end-joining

\*\*\*NHEJ=non-homologous end-joining

**Table S2. Dyes used in the current study.**

| Name of Dye                                        | Used to Detect     | Length of Staining | Concentration | Vendor       |
|----------------------------------------------------|--------------------|--------------------|---------------|--------------|
| Propidium Iodide                                   | DNA content        | 20 min             | 15 µg/mL      | Sigma        |
| Nonyl acridine orange (NAO)                        | Mitochondrial mass | 60 min             | 0.1 µM        | Invitrogen   |
| CM-H2DCFDA                                         | Total ROS          | 30 min             | 2.5 µM        | Invitrogen   |
| MitoTracker™ Green FM                              | Mitochondrial Mass | 60 min             | 0.1 µM        | Invitrogen   |
| CellEvent™ Senescence Green                        | SA-β-gal activity  | 60 min             | 1:1000        | Invitrogen   |
| 2-NBDG                                             | Glucose uptake     | 1-4 hr             | 100 µM        | Invitrogen   |
| BODIPY™ 505/515                                    | Neutral Lipid      | 30 min             | 10 µg/mL      | Invitrogen   |
| DAPI                                               | Nuclear Stain      | 10 min             | 0.2 µg/mL     | Sigma        |
| MitoSOX™ Red                                       | Mitochondrial ROS  | 40min              | 2.5 µM        | ThermoFisher |
| CellMask™ Orange Actin Tracking Stain              | Actin              | 20min              | 1:1000        | Invitrogen   |
| NucBlue™ Live ReadyProbes™ Reagent (Hoechst 33342) | Nuclear Stain      | 15min              | 2 drops/ml    | Invitrogen   |

**Table S3. Cell line information from the ENCODE data base used for ChIP studies**

| File accession | File format       | Output type              | File assembly | Experiment accession | Assay           | Biosample term name | Experiment target | File download URL                                                                                                                                                            |
|----------------|-------------------|--------------------------|---------------|----------------------|-----------------|---------------------|-------------------|------------------------------------------------------------------------------------------------------------------------------------------------------------------------------|
| ENCFF780JTP    | bed<br>narrowPeak | IDR thresholded<br>peaks | GRCh38        | ENCSR802UC<br>W      | TF ChIP-<br>seq | HepG2               | MLXIP-<br>human   | <a href="https://www.encodeproject.org/files/ENCFF780JTP/@download/ENCFF780JTP.bed.gz">https://www.encodeproject.org/files/ENCFF780JTP/@download/ENCFF780JTP.bed.<br/>gz</a> |
| ENCFF517GVP    | bed<br>narrowPeak | IDR thresholded<br>peaks | GRCh38        | ENCSR873LY<br>H      | TF ChIP-<br>seq | K562                | MLX-human         | <a href="https://www.encodeproject.org/files/ENCFF517GVP/@download/ENCFF517GVP.bed.gz">https://www.encodeproject.org/files/ENCFF517GVP/@download/ENCFF517GVP.bed<br/>.gz</a> |
| ENCFF132AJP    | bed<br>narrowPeak | IDR thresholded<br>peaks | GRCh38        | ENCSR125DA<br>D      | TF ChIP-<br>seq | HepG2               | MLX-human         | <a href="https://www.encodeproject.org/files/ENCFF132AJP/@download/ENCFF132AJP.bed.gz">https://www.encodeproject.org/files/ENCFF132AJP/@download/ENCFF132AJP.bed.<br/>gz</a> |
| ENCFF869OOK    | bed<br>narrowPeak | IDR thresholded<br>peaks | GRCh38        | ENCSR000D<br>MQ      | TF ChIP-<br>seq | MCF-7               | MYC-human         | <a href="https://www.encodeproject.org/files/ENCFF869OOK/@download/ENCFF869OOK.bed.gz">https://www.encodeproject.org/files/ENCFF869OOK/@download/ENCFF869OOK.be<br/>d.gz</a> |
| ENCFF270GMO    | bed<br>narrowPeak | IDR thresholded<br>peaks | GRCh38        | ENCSR000EB<br>Y      | TF ChIP-<br>seq | H1                  | MYC-human         | <a href="https://www.encodeproject.org/files/ENCFF270GMO/@download/ENCFF270GMO.bed.gz">https://www.encodeproject.org/files/ENCFF270GMO/@download/ENCFF270GMO.be<br/>d.gz</a> |
| ENCFF784BWK    | bed<br>narrowPeak | IDR thresholded<br>peaks | GRCh38        | ENCSR000DL<br>N      | TF ChIP-<br>seq | HeLa-S3             | MYC-human         | <a href="https://www.encodeproject.org/files/ENCFF784BWK/@download/ENCFF784BWK.bed.gz">https://www.encodeproject.org/files/ENCFF784BWK/@download/ENCFF784BWK.be<br/>d.gz</a> |
| ENCFF239IMY    | bed<br>narrowPeak | IDR thresholded<br>peaks | GRCh38        | ENCSR784BV<br>D      | TF ChIP-<br>seq | HepG2               | MYC-human         | <a href="https://www.encodeproject.org/files/ENCFF239IMY/@download/ENCFF239IMY.bed.gz">https://www.encodeproject.org/files/ENCFF239IMY/@download/ENCFF239IMY.bed<br/>.gz</a> |
| ENCFF608CXN    | bed<br>narrowPeak | IDR thresholded<br>peaks | GRCh38        | ENCSR000EG<br>J      | TF ChIP-<br>seq | K562                | MYC-human         | <a href="https://www.encodeproject.org/files/ENCFF608CXN/@download/ENCFF608CXN.bed.gz">https://www.encodeproject.org/files/ENCFF608CXN/@download/ENCFF608CXN.be<br/>d.gz</a> |
| ENCFF735PKA    | bed<br>narrowPeak | IDR thresholded<br>peaks | GRCh38        | ENCSR000DL<br>R      | TF ChIP-<br>seq | HepG2               | MYC-human         | <a href="https://www.encodeproject.org/files/ENCFF735PKA/@download/ENCFF735PKA.bed.gz">https://www.encodeproject.org/files/ENCFF735PKA/@download/ENCFF735PKA.bed<br/>.gz</a> |

|             |                   |                          |        |             |                 |                                          |           |                                                                                                                                                                           |
|-------------|-------------------|--------------------------|--------|-------------|-----------------|------------------------------------------|-----------|---------------------------------------------------------------------------------------------------------------------------------------------------------------------------|
| ENCFF342ASE | bed<br>narrowPeak | IDR thresholded<br>peaks | mm10   | ENCSR000ERN | TF ChIP-<br>seq | CH12.LX                                  | MYC-mouse | <a href="https://www.encodeproject.org/files/ENCFF342ASE/@@download/ENCFF342ASE.bed.gz">https://www.encodeproject.org/files/ENCFF342ASE/@@download/ENCFF342ASE.bed.gz</a> |
| ENCFF459QFK | bed<br>narrowPeak | IDR thresholded<br>peaks | GRCh38 | ENCSR000DLU | TF ChIP-<br>seq | endothelial cell<br>of<br>umbilical vein | MYC-human | <a href="https://www.encodeproject.org/files/ENCFF459QFK/@@download/ENCFF459QFK.bed.gz">https://www.encodeproject.org/files/ENCFF459QFK/@@download/ENCFF459QFK.bed.gz</a> |
| ENCFF152JNC | bed<br>narrowPeak | IDR thresholded<br>peaks | mm10   | ENCSR000EUA | TF ChIP-<br>seq | MEL                                      | MYC-mouse | <a href="https://www.encodeproject.org/files/ENCFF152JNC/@@download/ENCFF152JNC.bed.gz">https://www.encodeproject.org/files/ENCFF152JNC/@@download/ENCFF152JNC.bed.gz</a> |
| ENCFF385LDF | bed<br>narrowPeak | IDR thresholded<br>peaks | GRCh38 | ENCSR000DMJ | TF ChIP-<br>seq | MCF-7                                    | MYC-human | <a href="https://www.encodeproject.org/files/ENCFF385LDF/@@download/ENCFF385LDF.bed.gz">https://www.encodeproject.org/files/ENCFF385LDF/@@download/ENCFF385LDF.bed.gz</a> |
| ENCFF083NGY | bed<br>narrowPeak | IDR thresholded<br>peaks | GRCh38 | ENCSR000DOS | TF ChIP-<br>seq | MCF 10A                                  | MYC-human | <a href="https://www.encodeproject.org/files/ENCFF083NGY/@@download/ENCFF083NGY.bed.gz">https://www.encodeproject.org/files/ENCFF083NGY/@@download/ENCFF083NGY.bed.gz</a> |
| ENCFF961HAC | bed<br>narrowPeak | IDR thresholded<br>peaks | GRCh38 | ENCSR000DMP | TF ChIP-<br>seq | MCF-7                                    | MYC-human | <a href="https://www.encodeproject.org/files/ENCFF961HAC/@@download/ENCFF961HAC.bed.gz">https://www.encodeproject.org/files/ENCFF961HAC/@@download/ENCFF961HAC.bed.gz</a> |
| ENCFF850VMA | bed<br>narrowPeak | IDR thresholded<br>peaks | GRCh38 | ENCSR000EGS | TF ChIP-<br>seq | K562                                     | MYC-human | <a href="https://www.encodeproject.org/files/ENCFF850VMA/@@download/ENCFF850VMA.bed.gz">https://www.encodeproject.org/files/ENCFF850VMA/@@download/ENCFF850VMA.bed.gz</a> |
| ENCFF858ZYN | bed<br>narrowPeak | IDR thresholded<br>peaks | GRCh38 | ENCSR000EHR | TF ChIP-<br>seq | NB4                                      | MYC-human | <a href="https://www.encodeproject.org/files/ENCFF858ZYN/@@download/ENCFF858ZYN.bed.gz">https://www.encodeproject.org/files/ENCFF858ZYN/@@download/ENCFF858ZYN.bed.gz</a> |
| ENCFF598BZD | bed<br>narrowPeak | IDR thresholded<br>peaks | GRCh38 | ENCSR000DYC | TF ChIP-<br>seq | A549                                     | MYC-human | <a href="https://www.encodeproject.org/files/ENCFF598BZD/@@download/ENCFF598BZD.bed.gz">https://www.encodeproject.org/files/ENCFF598BZD/@@download/ENCFF598BZD.bed.gz</a> |
| ENCFF377XCI | bed<br>narrowPeak | IDR thresholded<br>peaks | GRCh38 | ENCSR000DMM | TF ChIP-<br>seq | MCF-7                                    | MYC-human | <a href="https://www.encodeproject.org/files/ENCFF377XCI/@@download/ENCFF377XCI.bed.gz">https://www.encodeproject.org/files/ENCFF377XCI/@@download/ENCFF377XCI.bed.gz</a> |



|             |                   |                          |        |             |                 |         |           |                                                                                                                                                                         |
|-------------|-------------------|--------------------------|--------|-------------|-----------------|---------|-----------|-------------------------------------------------------------------------------------------------------------------------------------------------------------------------|
| ENCFF792HVZ | bed<br>narrowPeak | IDR thresholded<br>peaks | GRCh38 | ENCSR000DOM | TF ChIP-<br>seq | MCF 10A | MYC-human | <a href="https://www.encodeproject.org/files/ENCFF792HVZ/@download/ENCFF792HVZ.bed.gz">https://www.encodeproject.org/files/ENCFF792HVZ/@download/ENCFF792HVZ.bed.gz</a> |
| ENCFF566CTX | bed<br>narrowPeak | IDR thresholded<br>peaks | GRCh38 | ENCSR000DLZ | TF ChIP-<br>seq | K562    | MYC-human | <a href="https://www.encodeproject.org/files/ENCFF566CTX/@download/ENCFF566CTX.bed.gz">https://www.encodeproject.org/files/ENCFF566CTX/@download/ENCFF566CTX.bed.gz</a> |
| ENCFF114VAI | bed<br>narrowPeak | IDR thresholded<br>peaks | GRCh38 | ENCSR744JJU | TF ChIP-<br>seq | K562    | MYC-human | <a href="https://www.encodeproject.org/files/ENCFF114VAI/@download/ENCFF114VAI.bed.gz">https://www.encodeproject.org/files/ENCFF114VAI/@download/ENCFF114VAI.bed.gz</a> |

---

**Table S4. Direct Myc and Mlx target genes from the 7 categories depicted in Fig. 5D and Figs. S3-S9).**

| Category                                     | Total no. of Transcripts* <sup>#</sup> | Total no. (%) enriched | Total no. (%) <sup>&amp;</sup> of direct Myc Targets | Total no. (%) <sup>&amp;</sup> of direct Mlx Targets | Total no. (%) <sup>&amp;</sup> of direct Mlx+Myc Targets |
|----------------------------------------------|----------------------------------------|------------------------|------------------------------------------------------|------------------------------------------------------|----------------------------------------------------------|
| Mitochondrial structure/ function            | 1013                                   | 629 (62.1)             | 497 (79.0)                                           | 245 (38.9)                                           | 210 (33.3)                                               |
| Ribosome structure/ function and translation | 1338                                   | 821 (61.4)             | 727 (88.5)                                           | 362 (44.0)                                           | 336 (40.9)                                               |
| Cell cycle regulation                        | 1066                                   | 557 (52.3)             | 456 (81.8)                                           | 219 (39.3)                                           | 207 (37.1)                                               |
| Aging                                        | 3014                                   | 1544 (51.2)            | 900 (58.2)                                           | 373 (24.1)                                           | 321 (20.7)                                               |
| Senescence                                   | 2129                                   | 1211 (56.9)            | 714 (58.9)                                           | 314 (25.9)                                           | 261 (21.5)                                               |
| DNA damage response/ DNA repair              | 878                                    | 483 (55.0)             | 415 (85.9)                                           | 195 (40.3)                                           | 182 (37.6)                                               |
| Cholesterol metabolism                       | 239                                    | 93 (38.9)              | 72 (77.4)                                            | 29 (31.1)                                            | 26 (27.9)                                                |
| All categories                               | 6880                                   | 3714 (54.0)            | 3714 (54.0)                                          | 1120 (30.2)                                          | 972 (26.2)                                               |

\*Transcripts from all available GSEA groups were retrieved from the 7 main categories depicted in Fig. 5D and Figs. S3-S9. 38.9-62.1% of these were found to be enriched. The proximal region of the genes encoding these transcripts (-2.5-+2.5 kb relative to the transcription start site) were then searched in the ENCODE data based to identify documented direct binding sites for Myc and / or Mlx.

<sup>&</sup>Relative to total no. of enriched targets

<sup>#</sup>Unique transcripts only; transcripts appearing more than once in any category were counted only once.
